# Supplementary material for: Identification and characterization of PDGFRα+ mesenchymal progenitors in human skeletal muscle
Source: PubMed Central journal article supplement — Cell Death Dis. 2014 Apr 17;5(4):e1186–. doi: 10.1038/cddis.2014.161 (PMC4001314; doi:10.1038/cddis.2014.161), 2014-04-17
Supplement: cddis2014161x1.pdf [file cddis2014161x1.pdf]

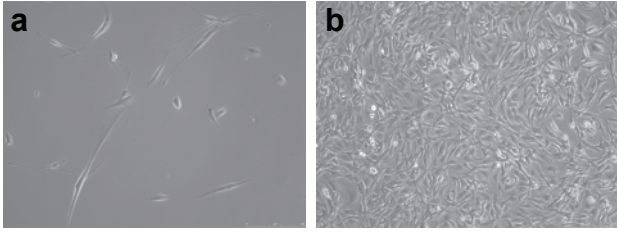

Supplementary figure S1

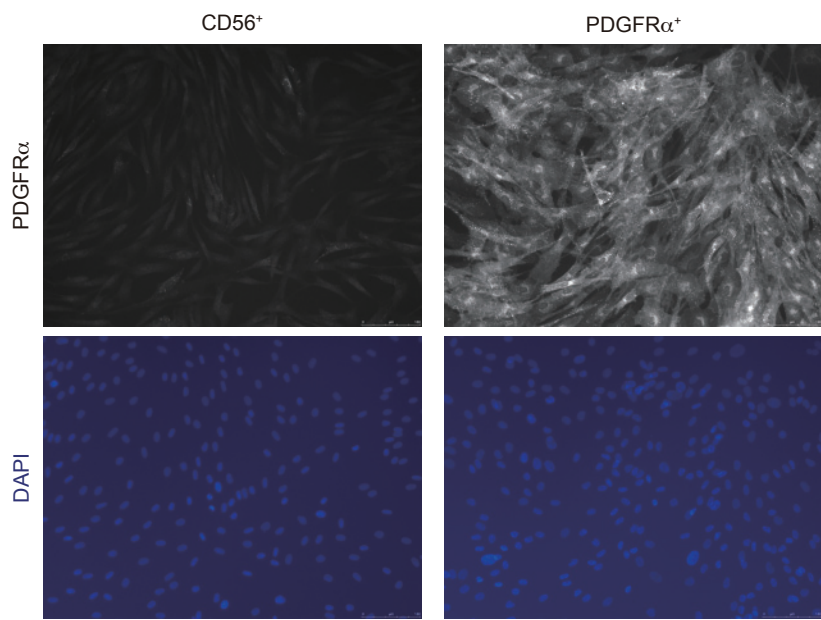

Supplementary figure S2

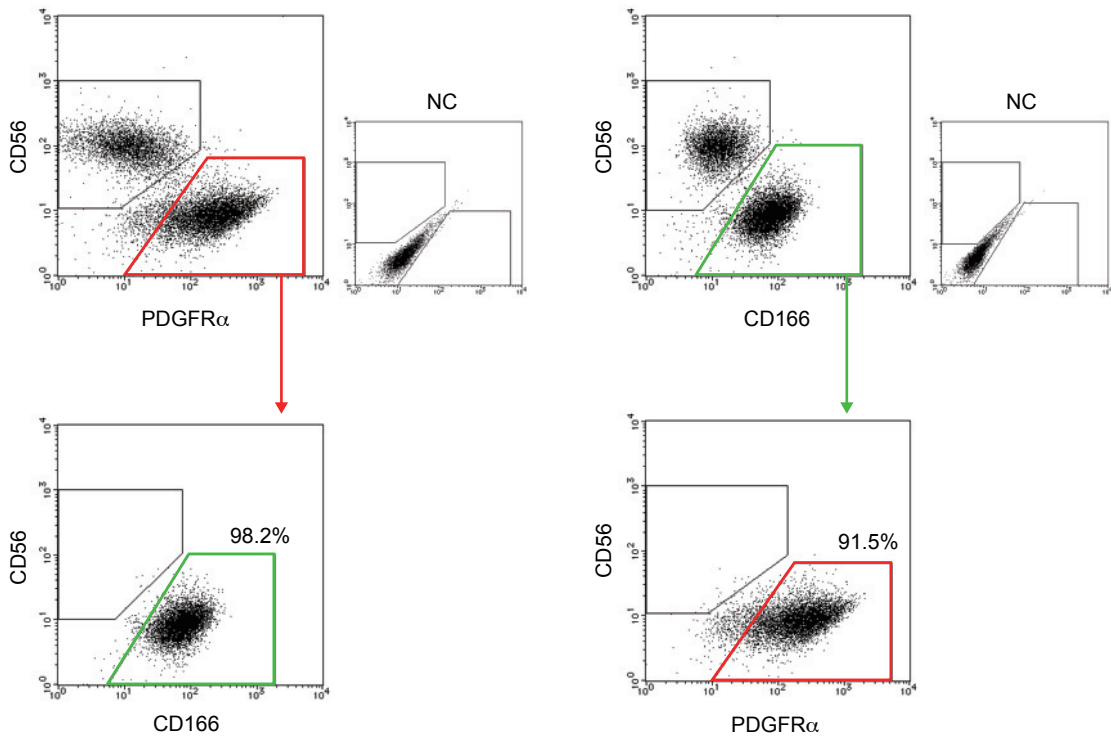

Supplementary figure S3

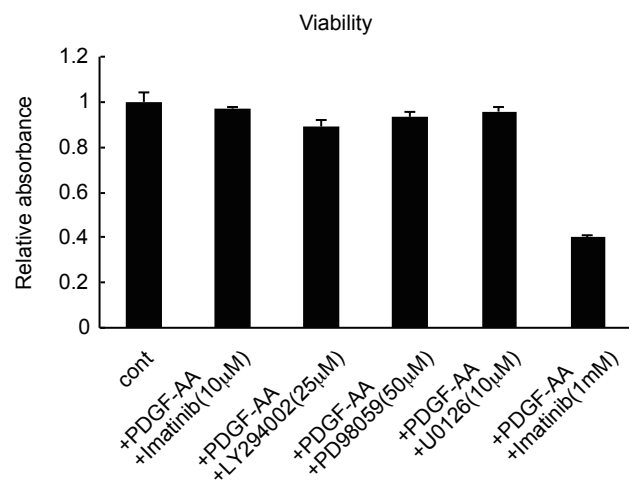

Supplementary figure S4

| Patient | HE                                                                                  | PDGFR $\alpha$                                                                      | Collagen I                                                                          | PDGFR $\alpha$ Collagen I<br>DAPI                                                   | PDGFR $\alpha$ staining grade | HOP content ( $\mu$ g/mg of tissue) |
|---------|-------------------------------------------------------------------------------------|-------------------------------------------------------------------------------------|-------------------------------------------------------------------------------------|-------------------------------------------------------------------------------------|-------------------------------|-------------------------------------|
| DMD1    | 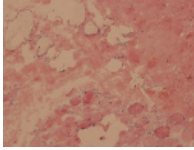    |     |     |     | 5                             | 7.55                                |
| DMD2    |    |    |    |    | 5                             | 6.38                                |
| DMD3    |    |    |    |    | 5                             | 3.30                                |
| DMD4    |    |    |    |    | 4                             | 5.89                                |
| DMD5    |    |    |    |    | 4                             | 4.75                                |
| DMD6    |   |   |   |   | 4                             | 4.54                                |
| DMD7    |  |  |  |  | 4                             | 2.42                                |
| DMD8    |  |  |  |  | 3                             | 3.62                                |
| DMD9    |  |  |  |  | 3                             | 2.98                                |
| DMD10   |  |  |  |  | 2                             | 3.69                                |
| DMD11   |  |  |  |  | 2                             | 2.38                                |
| Normal1 |  |  |  |  | 1                             | 0.54                                |
| Normal2 |  |  |  |  | 1                             | 0.51                                |
| Normal3 |  |  |  |  | 1                             | 0.67                                |

Supplementary figure S5

### **Supplementary figure legends**

**Supplementary figure S1.** Effect of oxygen concentration on the growth of human muscle-derived cells

Human muscle-derived cells were cultured in normoxic condition (a) or in hypoxic condition (3% O<sub>2</sub>, b). Scale bar: 100 μm.

**Supplementary figure S2.** Immunofluorescent staining of cultured cells

Cultured CD56<sup>+</sup> cells and PDGFRα<sup>+</sup> cells were subjected to immunofluorescent staining for PDGFRα. Scale bar: 50 μm.

**Supplementary figure S3.** Three-color FACS analysis of human muscle-derived cells

Human muscle-derived cells were stained with anti-CD166-FITC, anti-CD56-PE, and biotinylated anti-PDGFRα antibodies, and subsequently subjected to streptavidin-PE/Cy5 staining. Positive gates were set by analyzing negative control sample (shown on the right). Consistent results were obtained from three independent experiments.

**Supplementary figure S4.** Effect of chemical inhibitors on the viability of PDGFRα<sup>+</sup> cells

PDGFRα<sup>+</sup> cells were cultured with or without inhibitors at the concentration indicated. Cell viability was represented as the ratio to untreated control cells (cont) and shown as means ± s.d. of three independent preparations. One mM imatinib was used as positive control for toxic condition.

**Supplementary figure S5.** Correlation between PDGFR $\alpha$  staining grade and severity of fibrosis

HE staining images, immunofluorescent staining images (PDGFR $\alpha$  and collagen I), PDGFR $\alpha$  staining grades, and HOP contents from all patients investigated are shown.

Scale bars: 100  $\mu$ m in HE staining and 20  $\mu$ m in immunofluorescent staining.
